# Supplementary material for: A gap analysis of delivery of asthma care in Sri Lanka: Emphasizing the role of general practitioners and challenges
Source: Research Square preprint supplement (doi:10.21203/rs.3.rs-7155080/v1), 2025-09-04
Supplement: Supplementary file 1 [file c598481bbf44f5b5558f3638.pdf]

## Semi- Structured Interview Guide

| Topic                                      | Probes                                                                                                                                                                                                                                                                                                                                                                                                          |
|--------------------------------------------|-----------------------------------------------------------------------------------------------------------------------------------------------------------------------------------------------------------------------------------------------------------------------------------------------------------------------------------------------------------------------------------------------------------------|
| <b>General Practitioner role in asthma</b> | <ul style="list-style-type: none"><li>• What is your opinion about your role in managing patients with asthma?<br/>What responsibilities do you usually take on?</li><li>• What challenges do you face in fulfilling this role?</li><li>• What factors help you deliver effective asthma care?</li><li>• What recommendations would you make to improve GP's role in asthma care?</li></ul>                     |
| <b>Approach to assessment of asthma</b>    | <ul style="list-style-type: none"><li>• How do you approach to assess a patient with suspected asthma?</li><li>• What tools or criteria do you use?</li><li>• What issues or barriers do you encounter during the assessment?</li><li>• Do you have enough resources in your setting to assess a patient with asthma?</li><li>• How do you think asthma assessment could be improved in your setting?</li></ul> |

|                                                   |                                                                                                                                                                                                                                                                                                                                                                                                                                                                                                                                                                                       |
|---------------------------------------------------|---------------------------------------------------------------------------------------------------------------------------------------------------------------------------------------------------------------------------------------------------------------------------------------------------------------------------------------------------------------------------------------------------------------------------------------------------------------------------------------------------------------------------------------------------------------------------------------|
| <p><b>Approach to management</b></p>              | <ul style="list-style-type: none"> <li>• How do you manage acute asthma attacks in your practice?</li> <li>• How do you approach long-term asthma management?</li> <li>• Are you following the international or local guidelines in asthma management.</li> <li>• How do you ensure follow-up and continuity of care?</li> <li>• What makes it difficult to provide preventive or chronic care?</li> <li>• Are there any support systems that help you manage asthma better?</li> <li>• What changes could be made to improve asthma management at the primary care level?</li> </ul> |
| <p><b>Influence of socio-cultural factors</b></p> | <ul style="list-style-type: none"> <li>• How do patients generally perceive asthma as a disease?</li> <li>• What beliefs or cultural factors influence their behavior or treatment decisions?</li> <li>• Do you encounter stigma related to asthma or inhaler use?</li> </ul>                                                                                                                                                                                                                                                                                                         |

|  |                                                                                                                                                                                                                                                                 |
|--|-----------------------------------------------------------------------------------------------------------------------------------------------------------------------------------------------------------------------------------------------------------------|
|  | <ul style="list-style-type: none"><li>• How do these beliefs interfere with your ability to manage asthma?</li><li>• What strategies do you use to overcome these challenges?</li><li>• What would help improve patient understanding and acceptance?</li></ul> |
|--|-----------------------------------------------------------------------------------------------------------------------------------------------------------------------------------------------------------------------------------------------------------------|
